# Supplementary material for: CYR61 as a potential biomarker for the preoperative identification of muscle-invasive bladder cancers
Source: PubMed Central journal article supplement — Ann Transl Med. 2021 May;9(9):761. doi: 10.21037/atm-19-4511 (PMC8246191; doi:10.21037/atm-19-4511), 2021-05
Supplement: atm-09-09-761-supplementary.pdf [file atm-09-09-761-supplementary.pdf]

**Table S1** Demographics and tumor characteristics of patients in screening set and validation set

| Characteristics | Screening set (n=30), n (%)  |                           |         | Validation set (n=54), n (%) |                           |         |
|-----------------|------------------------------|---------------------------|---------|------------------------------|---------------------------|---------|
|                 | Noninvasive, Ta–T1<br>(n=16) | Invasive, T2–T4<br>(n=14) | P value | Noninvasive, Ta–T1<br>(n=32) | Invasive, T2–T4<br>(n=22) | P value |
| Age, years      |                              |                           | 0.815   |                              |                           | 0.561   |
| Mean ± SD       | 63.27±13.03                  | 64.87±10.89               |         | 63.03±10.45                  | 61.18±12.27               |         |
| Median [range]  | 66.0 [34–79]                 | 68.0 [42–78]              |         | 64.5 [43–82]                 | 64 [33–84]                |         |
| Gender          |                              |                           | 0.654   |                              |                           | 0.903   |
| Male            | 9 (56.3)                     | 9 (64.3)                  |         | 28 (87.5)                    | 19 (86.3)                 |         |
| Female          | 7 (43.7)                     | 5 (35.7)                  |         | 4 (12.5)                     | 3 (13.7)                  |         |
| Drink           |                              |                           | 0.134   |                              |                           | 0.583   |
| Yes             | 2 (12.5)                     | 5 (35.7)                  |         | 8 (25.0)                     | 7 (31.8)                  |         |
| No              | 14 (87.5)                    | 9 (64.3)                  |         | 24 (75.0)                    | 15 (68.2)                 |         |
| Smoking         |                              |                           | 0.301   |                              |                           | 0.421   |
| Yes             | 4 (25.0)                     | 6 (42.9)                  |         | 11 (34.4)                    | 10 (45.5)                 |         |
| No              | 12 (75.0)                    | 8 (57.1)                  |         | 21 (65.6)                    | 12 (54.5)                 |         |
| Tumor grade     |                              |                           | 0.732   |                              |                           | 0.071   |
| Low             | 7 (43.8)                     | 7 (50.0)                  |         | 15 (46.9)                    | 5 (22.7)                  |         |
| High            | 9 (56.3)                     | 7 (50.0)                  |         | 17 (53.1)                    | 17 (77.3)                 |         |
| Multifocality   |                              |                           | 0.654   |                              |                           | 0.165   |
| >1              | 9 (56.3)                     | 9 (64.3)                  |         | 22 (68.8)                    | 11 (50.0)                 |         |
| 1               | 7 (43.7)                     | 5 (35.7)                  |         | 10 (31.3)                    | 11 (50.0)                 |         |
| Recurrence      |                              |                           | 0.818   |                              |                           | 0.337   |
| Yes             | 4 (25.0)                     | 3 (21.4)                  |         | 14 (43.8)                    | 7 (31.8)                  |         |
| No              | 12 (75.0)                    | 11 (78.6)                 |         | 18 (56.3)                    | 15 (68.2)                 |         |

SD, standard deviation.

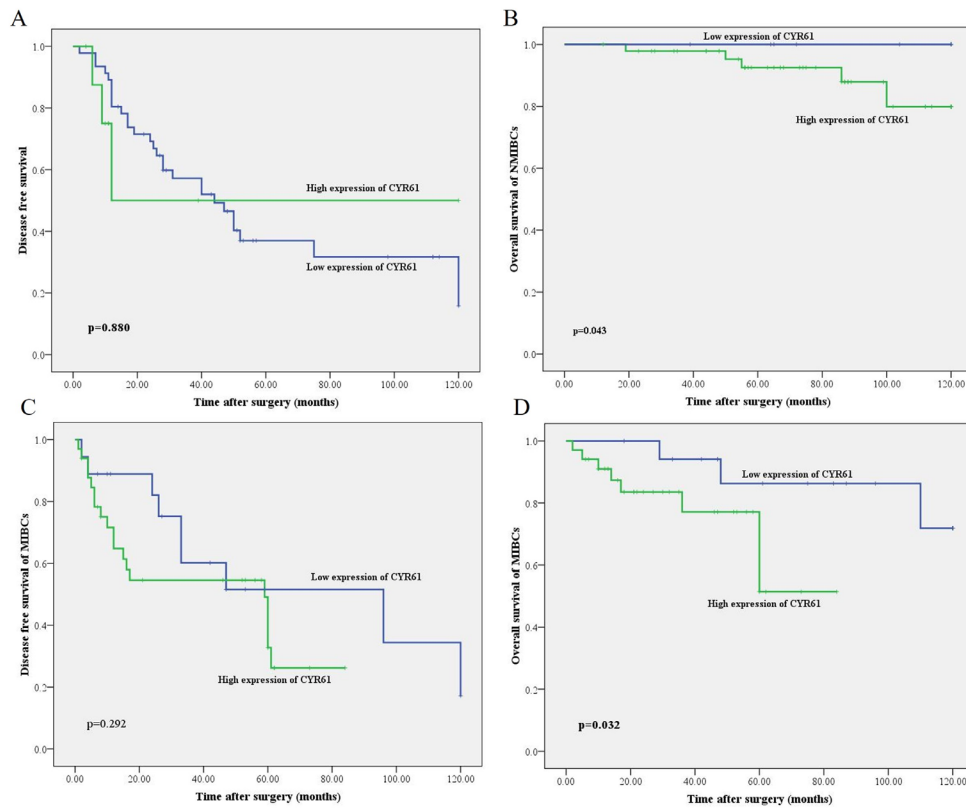

**Figure S1** Kaplan-Meier analysis of CYR61 expression in NMIBCs (n=56) and MIBC (n=52). (A) Relationship of CYR61 expression and NMIBCs patients' disease-free survival: low expression, n=46; high expression, n=10 (P=0.880, log-rank =0.023). (B) OS curves of NMIBCs by CYR61 expression (P=0.043, log-rank =5.235). (C) Relationship of CYR61 expression and MIBCs patients' disease-free survival: low expression, n=28; high expression, n=10 (P=0.292, log-rank =1.111). (D) OS curves of NMIBCs by CYR61 expression (P=0.032, log-rank =7.213). CYR61, cysteine-rich angiogenic inducer 61; NMIBC, non-muscle-invasive bladder cancer; MIBC, muscle-invasive bladder cancer; OS, overall survival.

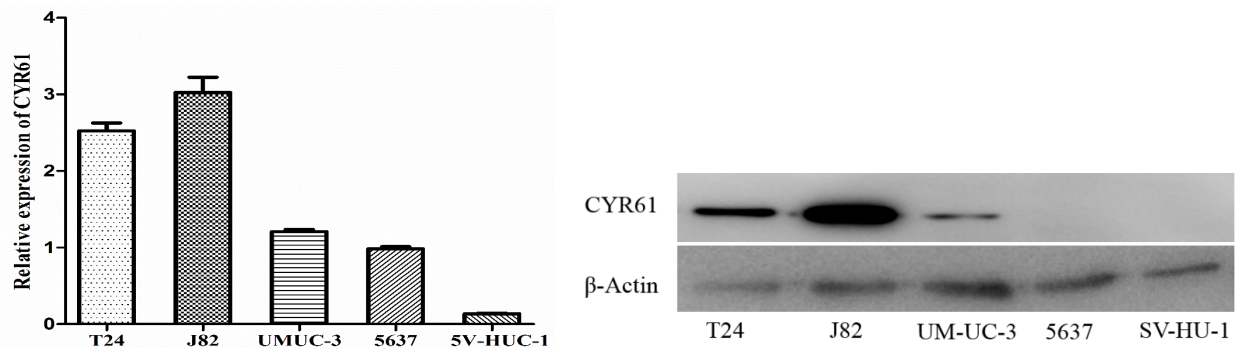

**Figure S2** Endogenous levels of CYR61 in different bladder carcinoma cells. CYR61, cysteine-rich angiogenic inducer 61.

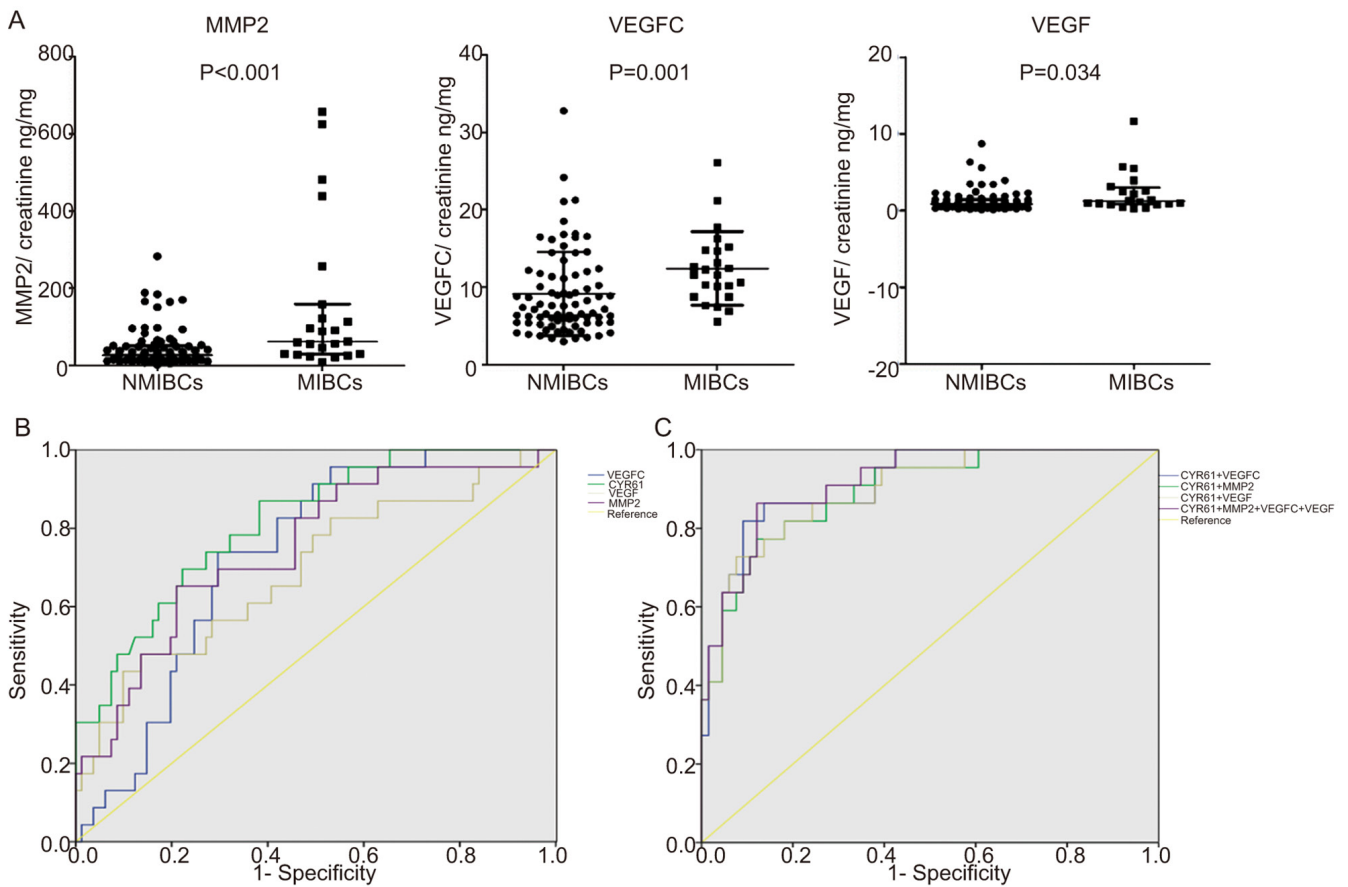

**Figure S3** Urine concentration and ROC curves of MMP-2, VEGFC, and VEGF in NMIBCs and MIBCs. (A) Urine concentration of MMP-2, VEGFC, and VEGF in NMIBCs and MIBCs. (B) ROC curves were plotted to compare the diagnostic performance of CYR61, MMP-2, VEGFC, and VEGF individually. (C) ROC curves were plotted to compare the diagnostic performance of CYR61, MMP-2, VEGFC, and VEGF together. ROC, receiver-operating characteristic; MMP-2, matrix metalloproteinase-2; NMIBC, non-muscle-invasive bladder cancer; MIBC, muscle-invasive bladder cancer; CYR61, cysteine-rich angiogenic inducer 61.

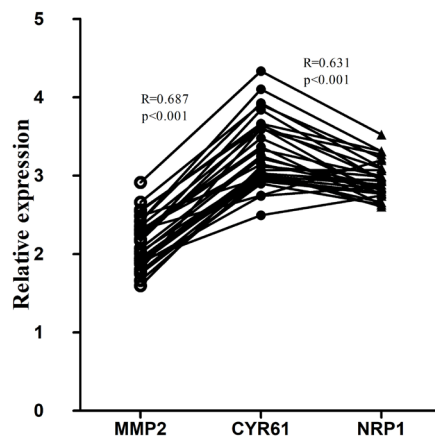

**Figure S4** The correlation between expression of CYR61 and MMP-2/NRP-1 in the gene expression profiling of 30 human bladder tumors. CYR61, cysteine-rich angiogenic inducer 61; MMP-2, matrix metalloproteinase-2; NRP-1, neuropilin-1.

**Table S2** Diagnostic performance of CYR61, MMP-2, VEGFC, and VEGF to distinguish MIBC from NMIBC individual

| Biomarker | AUC   | P value | Cutoff value (ng/mg) | Sensitivity | Specificity |
|-----------|-------|---------|----------------------|-------------|-------------|
| CYR61     | 0.883 | <0.001  | 4.596                | 0.727       | 0.860       |
| MMP-2     | 0.806 | <0.001  | 54.695               | 0.682       | 0.864       |
| VEGFC     | 0.796 | <0.001  | 9.939                | 0.727       | 0.788       |
| VEGF      | 0.736 | 0.001   | 0.790                | 0.818       | 0.561       |

CYR61, cysteine-rich angiogenic inducer 61; MMP-2, matrix metalloproteinase-2; MIBC, muscle-invasive bladder cancer; NMIBC, non-muscle-invasive bladder cancer; AUC, area under the curve.
